# Supplementary material
Source: MDPI journal article supplement (https://www.mdpi.com/2076-3417/12/16/8032)
Supplement: s1 [file s1]

# Revalorizing a pyrolytic char residue from post-consumer plastics into activated carbon for the adsorption of lead in water

Rafael R. Solís <sup>1</sup>, María Ángeles Martín-Lara <sup>2,\*</sup>, Ana Ligeró <sup>3</sup>, Josefa Balbís <sup>4</sup>, Gabriel Blázquez <sup>5</sup> and Mónica Calero <sup>6,\*</sup>

Chemical Engineering Department, Faculty of Sciences, University of Granada, 18071, Granada, Spain

\* Correspondence: marianml@ugr.es (M.Á.M.-L.); mcalero@ugr.es (M.C.)

**Table S1.** Summary of experimental conditions used for the preparation of the different activated carbons.

| Nomenclature       | Activating agent | Mass ratio C/agent | Step 1                            | Step 2                   | Step 3                             | Step 4                   |
|--------------------|------------------|--------------------|-----------------------------------|--------------------------|------------------------------------|--------------------------|
| SC-N <sub>2</sub>  | N <sub>2</sub>   | ---                | Heating<br>10 °C/min<br>30-760 °C | Holding<br>1 h<br>760 °C | ---                                | ---                      |
| SC-CO <sub>2</sub> | CO <sub>2</sub>  | ---                | Heating<br>10 °C/min<br>30-760 °C | Holding<br>1 h<br>760 °C | ---                                | ---                      |
| SC-NaOH            | NaOH             | 2:1                | Heating<br>10 °C/min<br>30-300 °C | Holding<br>1 h<br>300 °C | Heating<br>10 °C/min<br>300-760 °C | Holding<br>1 h<br>760 °C |
| SC-KOH             | KOH              | 2:1                | Heating<br>10 °C/min<br>30-300 °C | Holding<br>1 h<br>300 °C | Heating<br>10 °C/min<br>300-760 °C | Holding<br>1 h<br>760 °C |
